# Supplementary material for: The Crystal-T algorithm: a new approach to calculate the SLE of lipidic mixtures presenting solid solutions
Source: Royal Society of Chemistry journal article supplement (doi:10.1039/c4cp01529k), 2014-01-01
Supplement: c4cp01529k1.pdf [file c4cp01529k1.pdf]

## ELECTRONIC SUPPLEMENTARY INFORMATION

### Deduction of the SLE equations considering polymorphism phenomena

The isofugacity criteria establish that, in case of solid-liquid equilibrium (SLE), the fugacity of the compound  $f_i$  in both solid ( $S$ ) and liquid ( $L$ ) phases are equal.

$$f_i^S = f_i^L \quad \text{S1}$$

Equation S1 can be written in terms of the standard fugacity of the compounds  $f_i^0$  in each phase as follows:

$$x_i \gamma_i^L f_i^{L^0} = z_i \gamma_i^S f_i^{S^0} \quad \longrightarrow \quad \frac{x_i \gamma_i^L}{z_i \gamma_i^S} = \frac{f_i^{S^0}}{f_i^{L^0}} \quad \text{S2}$$

where  $x_i$  and  $z_i$  are mole fractions of the compound  $i$  in both liquid and solid phases, respectively, and  $\gamma_i^L$  and  $\gamma_i^S$  are the activity coefficients of both liquid and solid phases, respectively. It means that the temperature  $T$  of the system must be the same in both solid and liquid phases. This is attended considering a subcooled liquid state. The  $x_i \gamma_i^L / z_i \gamma_i^S$  ratio can be calculated by the variation of the Gibbs energy  $\Delta G$  as follows,

$$\Delta G = RT \ln \frac{f_i^{S^0}}{f_i^{L^0}} \quad \text{S3}$$

of the following process: heating the system from  $T$  to the melting temperature  $T_{\text{fus}}$ , followed by the complete melting and then cooling to the temperature  $T$ . The  $\Delta G$  of such a process is calculated by Equation S4, knowing the variation of the enthalpy  $\Delta H$  (Equation S5) and entropy  $\Delta S$  (Equation S6) of the process, and considering the  $n$  solid-solid transitions.

$$\Delta G = \Delta H + T\Delta S \quad \text{S4}$$

$$\Delta H = \sum_{i=1}^n \left( \int_T^{T_{tr}} C_{p_i}^S dT + \Delta_{tr}H \right) + \int_T^{T_{fus}} C_{p_i}^S dT + \Delta_{fus}H + \int_{T_{fus}}^T C_{p_i}^L dT + \sum_{i=1}^n \left( \int_{T_{tr}}^T C_{p_i}^L dT \right) \quad \text{S5}$$

$$\Delta S = \sum_{i=1}^n \left( \int_T^{T_{tr}} \frac{C_{p_i}^S}{T} dT + \frac{\Delta_{tr}H}{T_{tr}} \right) + \int_T^{T_{fus}} \frac{C_{p_i}^S}{T} dT + \frac{\Delta_{fus}H}{T_{fus}} + \int_{T_{fus}}^T \frac{C_{p_i}^L}{T} dT + \sum_{i=1}^n \left( \int_{T_{tr}}^T \frac{C_{p_i}^L}{T} dT \right) \quad \text{S6}$$

where  $\Delta_{fus}H$  and  $T_{fus}$  are the melting enthalpy and temperature of the compound  $i$ , and  $\Delta_{tr}H$  and  $T_{tr}$  are the solid-solid transitions enthalpy and temperature of the compound  $i$ . Knowing that the behavior of the heat capacity of the compound  $i$  in both liquid  $C_{p_i}^L$  and solid  $C_{p_i}^S$  phases as a function of the temperature is small<sup>1-3</sup> (in the range evaluated),  $C_{p_i}^L$  and  $C_{p_i}^S$  can be considered as constants as well as the variation of the heat capacity  $\Delta_{fus}C_p = C_{p_i}^L - C_{p_i}^S$ . Thus, the SLE can be determined by Equation S7 from  $T_{tr} < T < T_{fus}$ , by Equation S8 for  $T < T_{tr}$ , and analogously, in case of more than one solid-solid transition.

$$\ln \frac{x_i \gamma_i^L}{z_i \gamma_i^S} = \frac{\Delta_{fus}H}{R} \left( \frac{1}{T_{fus}} - \frac{1}{T} \right) + \frac{\Delta_{fus}C_p}{R} \left( \frac{T_{fus}}{T} - \ln \frac{T_{fus}}{T} - 1 \right) \quad \text{S7}$$

$$\ln \frac{x_i \gamma_i^L}{z_i \gamma_i^S} = \frac{\Delta_{fus}H}{R} \left( \frac{1}{T_{fus}} - \frac{1}{T} \right) + \frac{\Delta_{tr}H}{R} \left( \frac{1}{T_{tr}} - \frac{1}{T} \right) + \frac{\Delta_{fus}C_p}{R} \left( \frac{T_{fus}}{T} - \ln \frac{T_{fus}}{T} - 1 \right) \quad \text{S8}$$

**Table S1.** Melting temperatures ( $T_{fus}$  / K) and enthalpies ( $\Delta_{fus}H$  / kJ·mol<sup>-1</sup>) and solid-solid temperatures ( $T_{tr}$  / K) and enthalpies ( $\Delta_{tr}H$  / kJ·mol<sup>-1</sup>) of the pure compounds used in the modeling procedure and obtained in this work or from literature.

| Compound      | $T_{fus}$ | ref.      | $\Delta_{fus}H$ | ref.      | $T_{tr1}$           | ref.         | $\Delta_{tr1}H$ | lit.         | $T_{tr2}$ | ref.         | $\Delta_{tr2}H$ | ref.         |
|---------------|-----------|-----------|-----------------|-----------|---------------------|--------------|-----------------|--------------|-----------|--------------|-----------------|--------------|
| Trilaurin     | 319.39    |           | 116.45          |           | 308.25              | <sup>4</sup> | 86.00           | <sup>4</sup> | 288.75    | <sup>4</sup> | 69.80           | <sup>4</sup> |
| Trimyristin   | 330.90    |           | 141.97          | this work | 319.05              | <sup>4</sup> | 106.00          | <sup>4</sup> | 305.75    | <sup>4</sup> | 81.90           | <sup>4</sup> |
| Tripalmitin   | 338.98    | this work | 165.88          |           | 328.85              | <sup>4</sup> | 126.50          | <sup>4</sup> | 317.85    | <sup>4</sup> | 95.80           | <sup>4</sup> |
| 1-hexadecanol | 322.61    |           | 33.60           |           | <sup>5</sup> 321.89 |              | 23.70           | <sup>5</sup> | -         |              | -               |              |
| 1-octadecanol | 331.42    |           | 40.10           |           | <sup>6</sup> 330.55 | this work    | 26.50           | <sup>6</sup> | -         |              | -               |              |

**Table S2.** Experimental solid-liquid equilibrium data for the triacylglycerols + fatty alcohols systems for mole fraction  $x$  and temperature  $T$  for *solidus* and *liquidus* line.<sup>†</sup>

| trilaurin (1) +<br>1-hexadecanol (2) |                      |                       | trilaurin (1) +<br>1-octadecanol (2) |                      |                       | trimyristin (1) +<br>1-hexadecanol (2) |                      |                       |
|--------------------------------------|----------------------|-----------------------|--------------------------------------|----------------------|-----------------------|----------------------------------------|----------------------|-----------------------|
| $x_1$                                | <i>Solidus</i><br>/K | <i>Liquidus</i><br>/K | $x_1$                                | <i>Solidus</i><br>/K | <i>Liquidus</i><br>/K | $x_1$                                  | <i>Solidus</i><br>/K | <i>Liquidus</i><br>/K |
| 0.000                                |                      | 322.61                | 0.000                                |                      | 331.42                | 0.000                                  |                      | 322.61                |
| 0.097                                | 315.39               | 321.13                | 0.101                                | 317.31               | 330.00                | 0.042                                  | 320.35               | 321.68                |
| 0.197                                | 315.44               | 319.48                | 0.197                                | 317.42               | 328.56                | 0.100                                  |                      | 319.98                |
| 0.295                                | 315.55               | 318.38                | 0.294                                | 317.50               | 327.25                | 0.137                                  |                      | 320.82                |
| 0.402                                | 315.96               | 317.30                | 0.395                                | 317.67               | 325.84                | 0.192                                  | 320.11               | 322.05                |
| 0.503                                |                      | 315.86                | 0.501                                | 317.56               | 323.71                | 0.246                                  | 319.89               | 322.98                |
| 0.592                                | 315.85               | 316.28                | 0.597                                | 318.01               | 321.73                | 0.394                                  | 319.11               | 324.71                |
| 0.703                                | 315.18               | 316.79                | 0.701                                | 317.76               | 319.85                | 0.498                                  | 319.30               | 326.30                |
| 0.781                                | 315.06               | 317.15                | 0.790                                | 317.76               | 318.67                | 0.594                                  | 318.99               | 326.78                |
| 0.863                                | 315.00               | 318.58                | 0.884                                | 317.70               | 318.77                | 0.694                                  | 318.80               | 327.59                |
| 1.000                                |                      | 319.39                | 1.000                                |                      | 319.39                | 0.778                                  | 319.10               | 328.24                |
|                                      |                      |                       |                                      |                      |                       | 0.894                                  | 323.55 ‡             | 329.24                |
|                                      |                      |                       |                                      |                      |                       | 1.000                                  |                      | 330.90                |

  

| trimyristin (1) +<br>1-octadecanol (2) |                      |                       | tripalmitin (1) +<br>1-hexadecanol (2) |                      |                       | tripalmitin (1) +<br>1-octadecanol (2) |                      |                       |
|----------------------------------------|----------------------|-----------------------|----------------------------------------|----------------------|-----------------------|----------------------------------------|----------------------|-----------------------|
| $x_1$                                  | <i>Solidus</i><br>/K | <i>Liquidus</i><br>/K | $x_1$                                  | <i>Solidus</i><br>/K | <i>Liquidus</i><br>/K | $x_1$                                  | <i>Solidus</i><br>/K | <i>Liquidus</i><br>/K |
| 0.000                                  |                      | 331.42                | 0.000                                  |                      | 322.61                | 0.000                                  |                      | 331.42                |
| 0.100                                  | 325.99               | 329.88                | 0.050                                  |                      | 322.60                | 0.058                                  | 329.20               | 330.27                |
| 0.199                                  | 326.26               | 328.60                | 0.101                                  | 322.90               | 328.69                | 0.099                                  | 328.90               | 329.80                |
| 0.300                                  | 326.01               | 327.28                | 0.201                                  | 321.90               | 331.98                | 0.151                                  |                      | 329.56                |
| 0.393                                  |                      | 325.90                | 0.299                                  | 321.93               | 333.62                | 0.200                                  | 328.95               | 331.40                |
| 0.493                                  |                      | 325.88                | 0.408                                  | 321.68               | 334.75                | 0.300                                  | 328.80               | 333.40                |
| 0.592                                  | 325.77               | 326.73                | 0.501                                  | 321.90               | 335.93                | 0.401                                  | 329.50               | 334.79                |
| 0.691                                  | 325.65               | 327.67                | 0.597                                  | 322.00               | 336.61                | 0.502                                  | 328.80               | 335.63                |
| 0.793                                  | 325.48               | 328.90                | 0.701                                  | 321.82               | 337.35                | 0.595                                  | 329.00               | 336.63                |
| 0.878                                  | 325.61               | 329.52                | 0.800                                  | 330.45 ‡             | 338.32                | 0.697                                  | 329.20               | 337.35                |
| 1.000                                  |                      | 330.90                | 0.894                                  | 336.05 ‡             | 338.85                | 0.797                                  | 332.05 ‡             | 338.16                |
|                                        |                      |                       | 1.000                                  |                      | 338.98                | 0.906                                  | 335.85 ‡             | 338.82                |
|                                        |                      |                       |                                        |                      |                       | 1.000                                  |                      | 338.98                |

<sup>†</sup> Uncertainties for molar fraction and *liquidus* line temperature are  $\pm 0.001$  and 0.38 K. Uncertainty for *solidus* line temperature measured by DSC and by microscopy <sup>‡</sup> is  $\pm 0.58$  K.

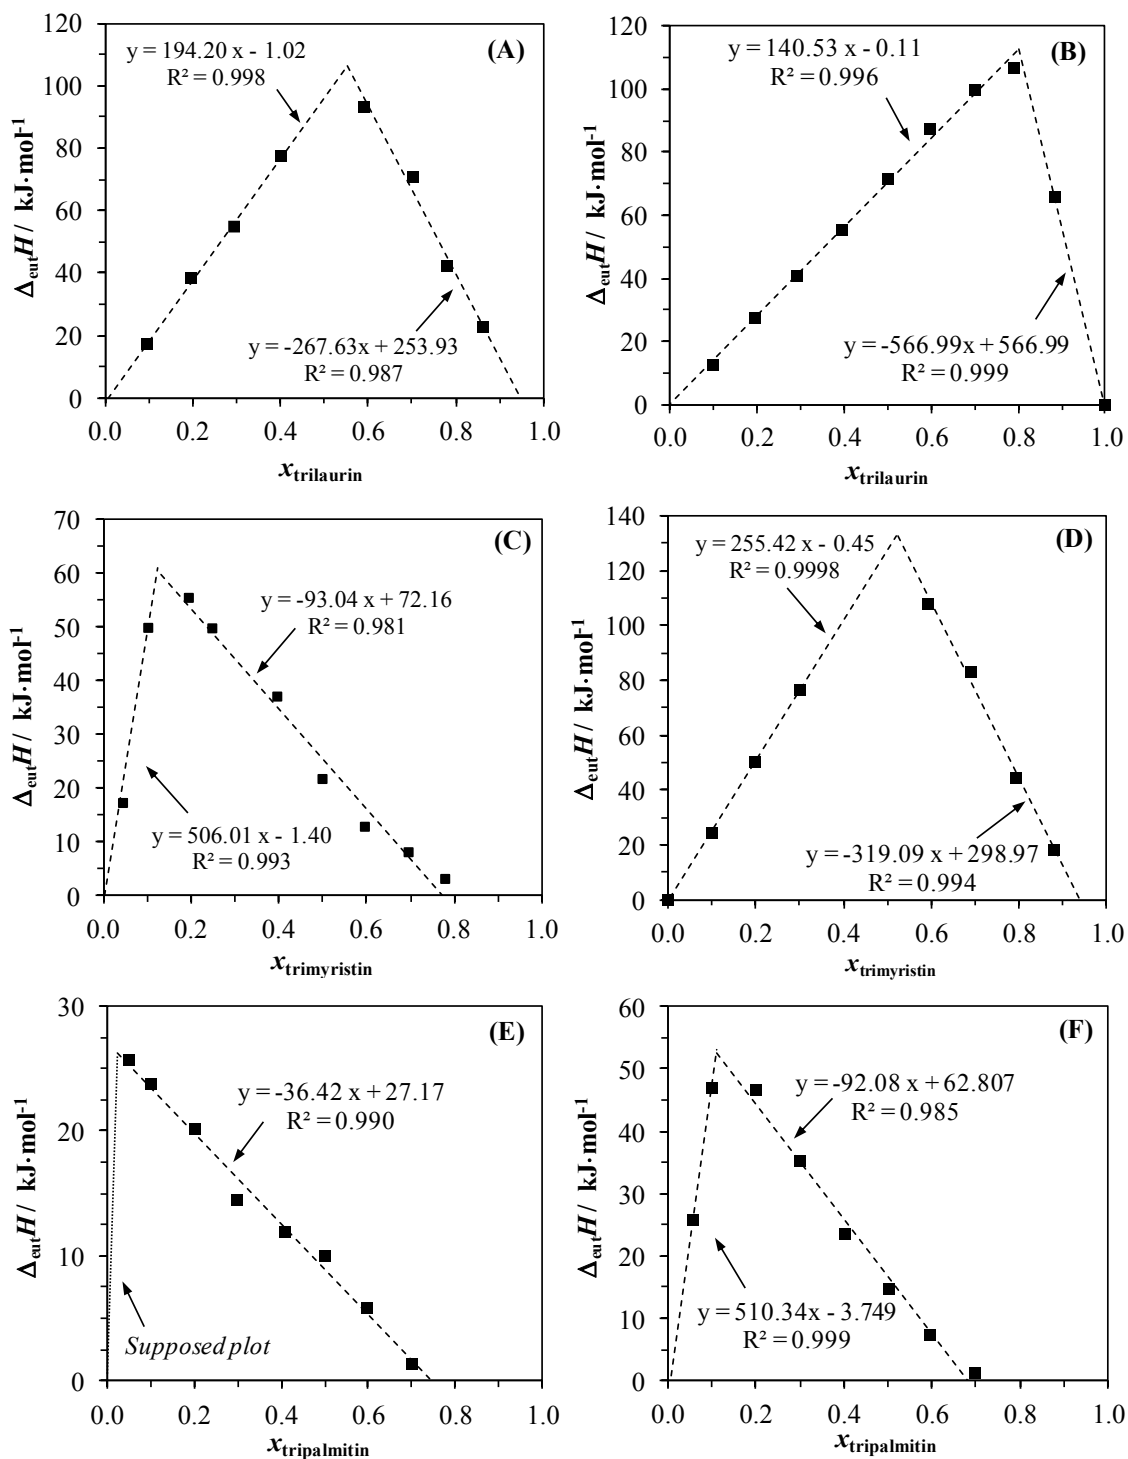

**Figure S1.** Tammann plots of the experimental eutectic transition enthalpy  $\Delta_{\text{eut}}H$  (■) and linear regression (dashed lines) for the systems A) trilaurin (1) + 1-hexadecanol (2), B) trilaurin (1) + 1-octadecanol (2), C) trimyrustin (1) + 1-hexadecanol (2), D) trimyrustin (1) + 1-octadecanol (2), E) tripalmitin (1) + 1-hexadecanol (2), F) tripalmitin (1) + 1-octadecanol (2).

## REFERENCES

1. G. Charbonnet and W. S. Singleton, *J. Am. Oil Chem. Soc.*, 1947, **24**, 140.
2. R. Ceriani, R. Gani and A. J. A. Meirelles, *Fluid Phase Equilibr.*, 2009, **283**, 49.
3. J. Xing, Z. C. Tan, Q. Shi, B. Tong, S. X. Wang and Y. S. Li, *J. Therm. Anal. Calorim.*, 2008, **92**, 375.
4. L. H. Wesdorp, Liquid-multiple solid phase equilibria in fats, theory and experiments, Doctoral Thesis, Delft University of Technology, Delft, 1990.
5. C. Mosselman, J. Mourik and H. Dekker, *J. Chem. Thermodyn.*, 1974, **6**, 477.
6. L. Ventolà, M. Ramírez, T. Calvet, X. Solans, M. A. Cuevas-Diarte, P. Negrier, D. Mondieig, J. C. van Miltenburg and H. A. J. Oonk, *Chem. Mater.*, 2002, **14**, 508.
